# Supplementary material for: The relationship between obstructive sleep apnea and obesity hypoventilation syndrome: a systematic review and meta-analysis
Source: PubMed Central journal article supplement (PMC5696252; doi:10.18632/oncotarget.21450), 2017-10-03

## The relationship between obstructive sleep apnea and obesity hypoventilation syndrome: a systematic review and meta-analysis

### SUPPLEMENTARY MATERIALS

**Supplementary Tables 1: Evaluation of the quality of the 10 included studies by using the Newcastle-Ottawa Scale#**

| Factor                    | Study type         | Selection |   |   |   | Comparability | Exposure or outcome |   |   | Total |
|---------------------------|--------------------|-----------|---|---|---|---------------|---------------------|---|---|-------|
|                           |                    | 1         | 2 | 3 | 4 |               | 1                   | 2 | 3 |       |
| Resta et al., 2000        | Cohort Study       | ★         | ★ | ★ | ★ |               | ★                   |   |   | 5     |
| Akashiba et al., 2006     | Cohort Study       | ★         | ★ | ★ | ★ | ★             | ★                   |   |   | 6     |
| Mokhlesi et al., 2007     | Case-Control Study | ★         | ★ | ★ | ★ |               | ★                   | ★ | ★ | 7     |
| Mokhlesi et al., 2007 (2) | Cohort Study       | ★         | ★ | ★ | ★ |               | ★                   |   |   | 5     |
| Alzaabi et al., 2013      | Cohort Study       | ★         | ★ | ★ | ★ | ★             | ★                   |   |   | 6     |
| Basoglu et al., 2014      | Case-Control Study | ★         | ★ | ★ | ★ | ★             | ★                   | ★ | ★ | 8     |
| Harada et al., 2014       | Cohort Study       | ★         | ★ | ★ | ★ | ★             | ★                   |   |   | 6     |
| Bingol et al., 2015       | Cohort Study       | ★         | ★ | ★ | ★ | ★             | ★                   |   |   | 6     |
| Pihlilä et al., 2017      | Case-Control Study | ★         | ★ | ★ | ★ | ★             | ★                   | ★ | ★ | 8     |

# The Newcastle-Ottawa Scale criteria are listed in supplemental files.

**Supplementary Tables 2: Weighted means and percentages of patients with and without OHS per risk factor**

| outcomes              | Studies, no. | OHS+OSA | Pure OSA | WMD/OR* (95% CI)      | P value   | Study heterogeneity I <sup>2</sup> |
|-----------------------|--------------|---------|----------|-----------------------|-----------|------------------------------------|
| BMI                   | 9            | 575     | 1510     | 4.72 (4.26, 5.17)     | 0.001     | 90%                                |
| AHI                   | 9            | 434     | 1129     | 8.36 (6.73, 9.99)     | < 0.00001 | 25%                                |
| Age                   | 9            | 575     | 1510     | 0.08 (-0.42, 0.25)    | 0.62      | 90%                                |
| Mean SpO <sup>2</sup> | 6            | 416     | 1040     | -3.36 (-3.88, -2.84)  | < 0.00001 | 50%                                |
| FEV1                  | 7            | 537     | 1279     | -8.48 (-13.03, -3.22) | 0.0003    | 92%                                |
| VC%                   | 8            | 557     | 1421     | -8.77 (-12.00, -5.54) | < 0.00001 | 81%                                |
| FEV1/FVC              | 7            | 456     | 1305     | -0.57 (-1.58, 0.44)   | 0.27      | 59%                                |
| Neck circumference    | 4            | 172     | 693      | 1.01 (0.10, 1.92)     | 0.03      | 59%                                |
| Waist/hip ratio       | 2            | 84      | 230      | -0.04 (-0.19, 0.12)   | 0.64      | 46%                                |
| Gender (male)         | 8            | 529     | 1406     | 1.62* (0.66, 3.98)    | 0.29      | 93%                                |

### Supplementary Tables 3: Characteristics of included studies

| Study                         | Year     | Country | Patient no. |                | BMI > 30<br>Kg/m <sup>2</sup> | COPD     | Matching                       |
|-------------------------------|----------|---------|-------------|----------------|-------------------------------|----------|--------------------------------|
|                               |          |         | OHS+OSA     | OSA            |                               |          |                                |
| Resta et al. <sup>18</sup>    | 2000     | Italy   | 29          | 168*           | No                            | ?        | 1, 2, 3, 4, 5, 6, 7, 8, 9, 11  |
| Akashiba et al. <sup>19</sup> | 2006     | Japan   | 55          | 117 $\text{§}$ | Yes                           | ?        | 1, 2, 3, 4, 6, 7               |
| Mokhlesi et al. <sup>20</sup> | 2007     | America | 52          | 111 $\text{P}$ | No                            | excluded | 1, 3, 6, 7, 8, 11              |
| Mkhlesi et al. <sup>20</sup>  | 2007 (2) | America | 89          | 270 $\text{P}$ | No                            | excluded | 1, 2, 3, 6, 7, 8, 11           |
| Alzaabi et al. <sup>21</sup>  | 2013     | UAE     | 18          | 89 $\text{P}$  | Yes                           | ?        | 1, 2, 3, 8, 11                 |
| Basoglu et al. <sup>22</sup>  | 2014     | Turkey  | 59          | 295 $\text{P}$ | ?                             | excluded | 1, 2, 3, 4, 5, 6, 7, 8, 9, 11  |
| Harada et al. <sup>23</sup>   | 2014     | Japan   | 20          | 142 $\text{P}$ | Yes                           | ?        | 1, 2, 3, 4, 5, 7, 8, 9, 10, 11 |
| Bingol et al. <sup>24</sup>   | 2015     | Turkey  | 64          | 88 $\text{P}$  | Yes                           | ?        | 1, 2, 3, 4, 6, 7, 9, 10, 11    |
| Pihtü et al. <sup>25</sup>    | 2017     | Turkey  | 189         | 230?           | Yes                           | excluded | 1, 2, 3, 4, 5, 6, 7, 8, 11     |

UAE = United Arab Emirates; 1 = BMI; 2=AHI; 3 = Age; 4 = mean SpO<sub>2</sub>; 5=TST SpO<sub>2</sub>; 6 = FEV<sub>1</sub>; 7 = VC%; 8 = FEV<sub>1</sub>/FVC%; 9 = Neck circumference; 10 = Waist/hip ratio; 11 = Gender. ? = not reported, \* = OSA defined as AHI > 10,  $\text{§}$  = OSA defined as AHI > 20,  $\text{P}$  = OSA defined as AHI > 5.

**Supplementary Tables 4: Search strategy profile**

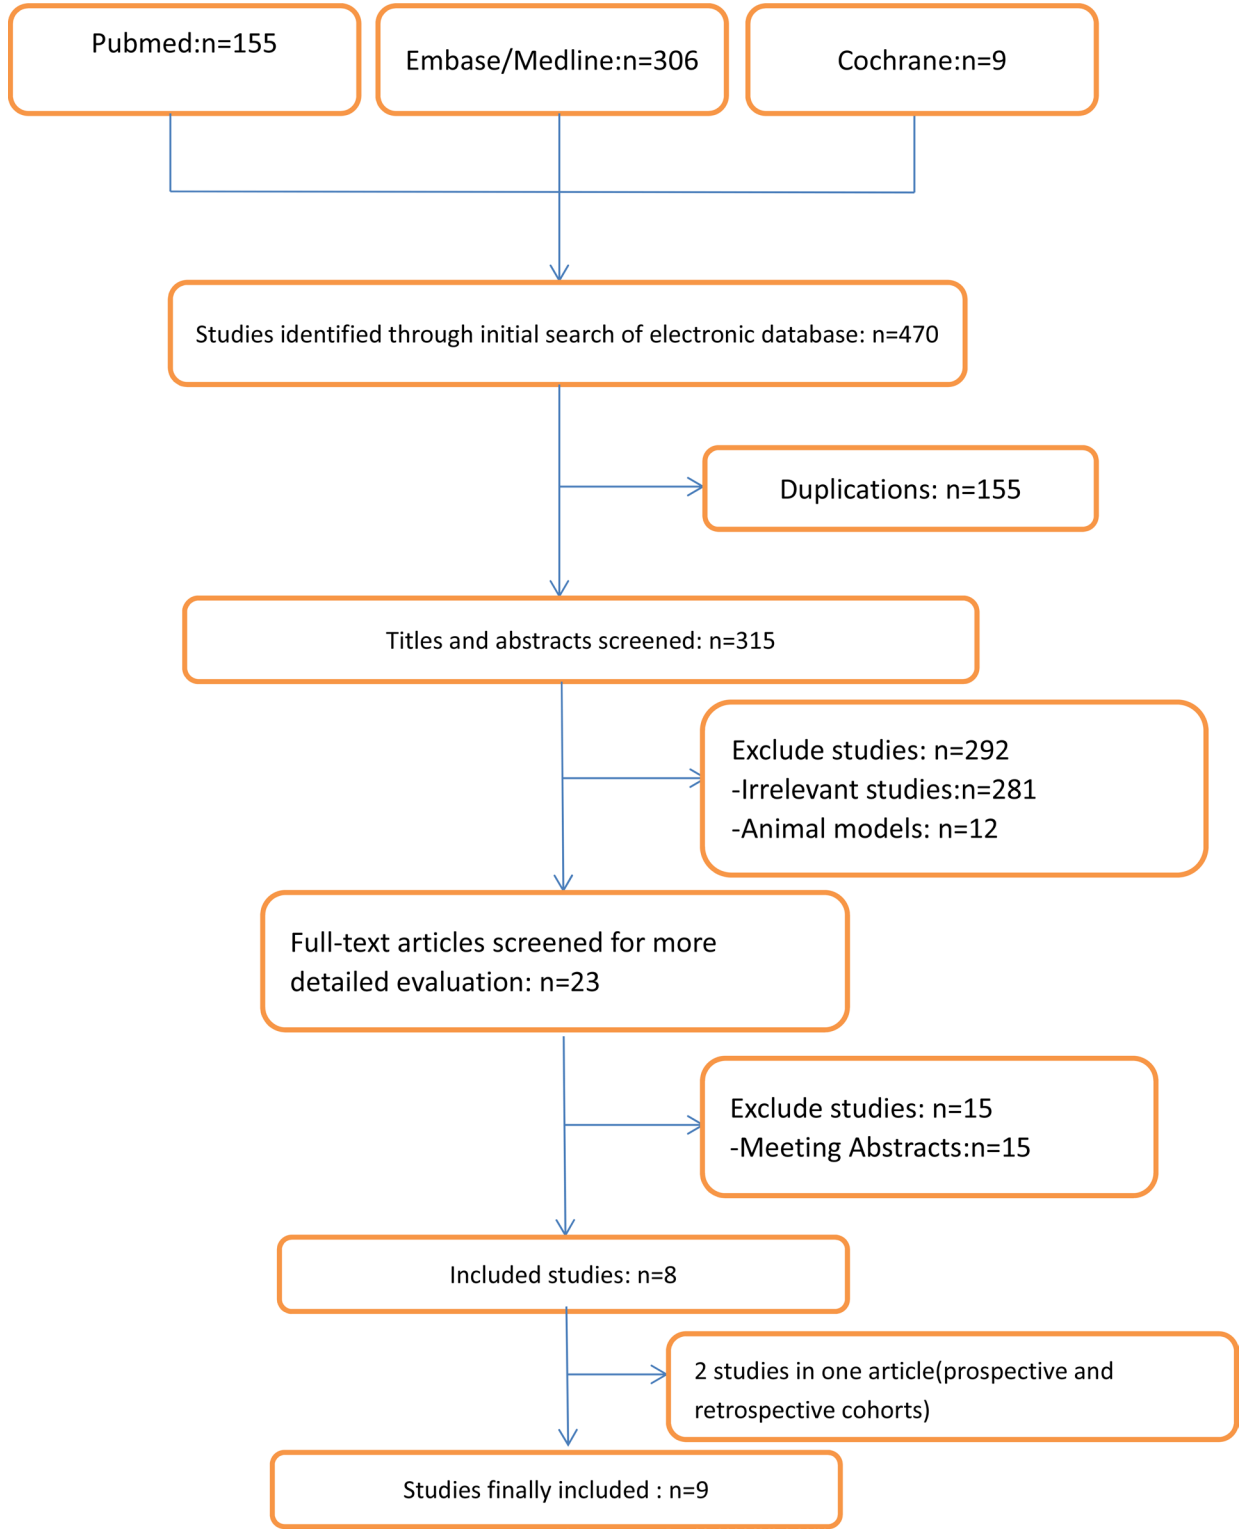

Supplement: oncotarget-08-93168-s001.pdf [file oncotarget-08-93168-s001.pdf]
